# Supplementary material for: Tuning the composition of gold–silver bimetallic nanoparticles for the electrochemical reduction of hydrogen peroxide and nitrobenzene
Source: Royal Society of Chemistry journal article supplement (doi:10.1039/c6ra05658j), 2016-01-01
Supplement: c6ra05658j1.pdf [file c6ra05658j1.pdf]

**Supplementary Information (SI)**

**Tuning the Composition of Gold-Silver Bimetallic Nanoparticles for the  
Electrochemical Reduction of Hydrogen Peroxide and Nitrobenzene**

**N.S.K. Gowthaman, Bharathi Sinduja and S. Abraham John\***

Centre for Nanoscience and Nanotechnology  
Department of Chemistry, Gandhigram Rural Institute  
Gandhigram-624 302, Dindigul, Tamilnadu, India  
E-mail : [abrajohn@yahoo.co.in](mailto:abrajohn@yahoo.co.in)

---

\*Corresponding author: Tel: +91 451 245 2371; Fax : + 91 451 245 3031

E-mail: [abrajohn@yahoo.co.in](mailto:abrajohn@yahoo.co.in) , [s.abrahamjohn@ruraluniv.ac.in](mailto:s.abrahamjohn@ruraluniv.ac.in)

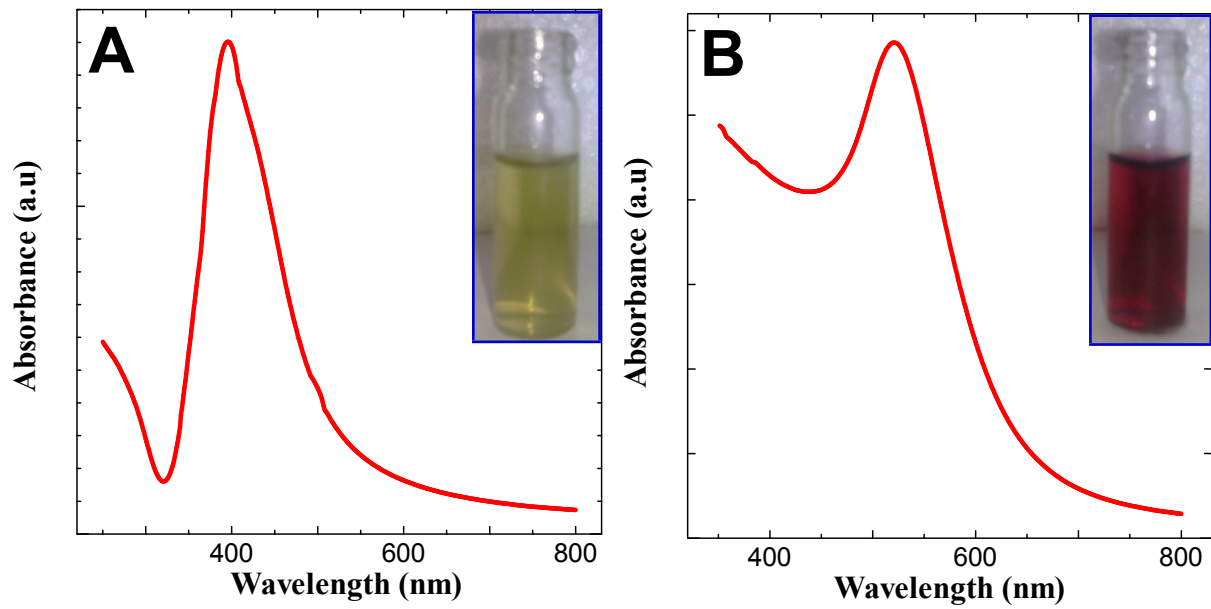

**Figure S1.** UV-vis spectra obtained for (A) AgNPs and (B) AuNPs. Insets: Photographs of (A) AgNPs and (B) AuNPs.

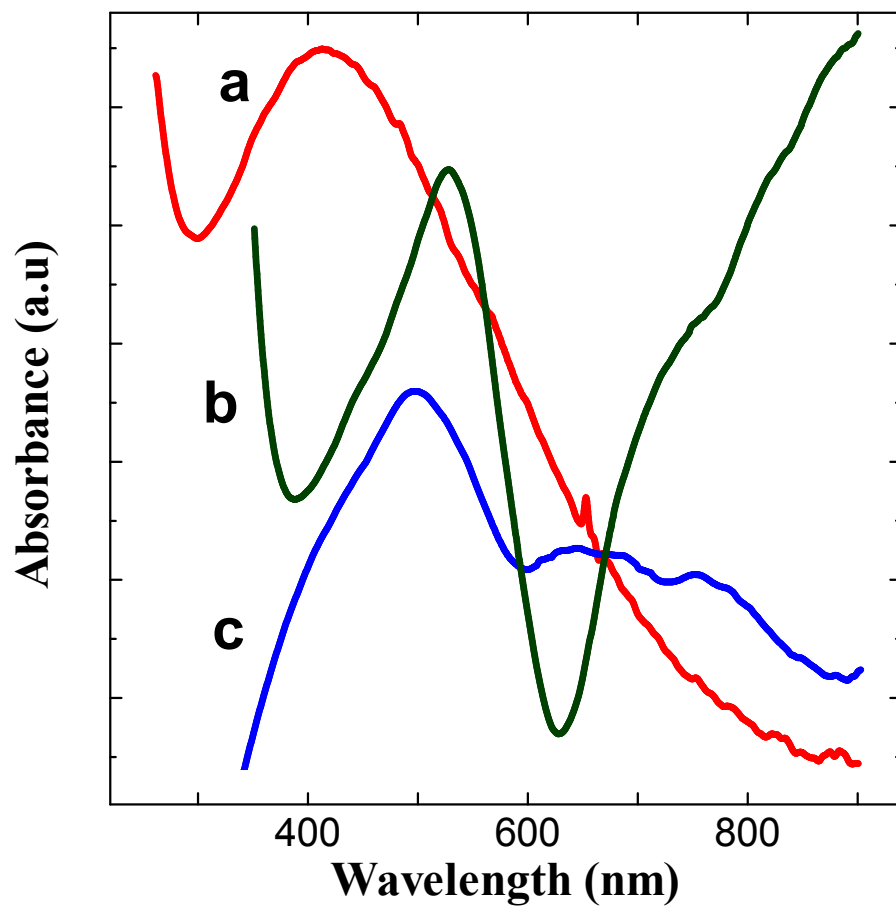

**Figure S2.** DRS obtained for (a) GC/HDA/AgNPs, (b) GC/HDA/AuNPs and (c) GC/HDA/Au-AgNPs electrodes.

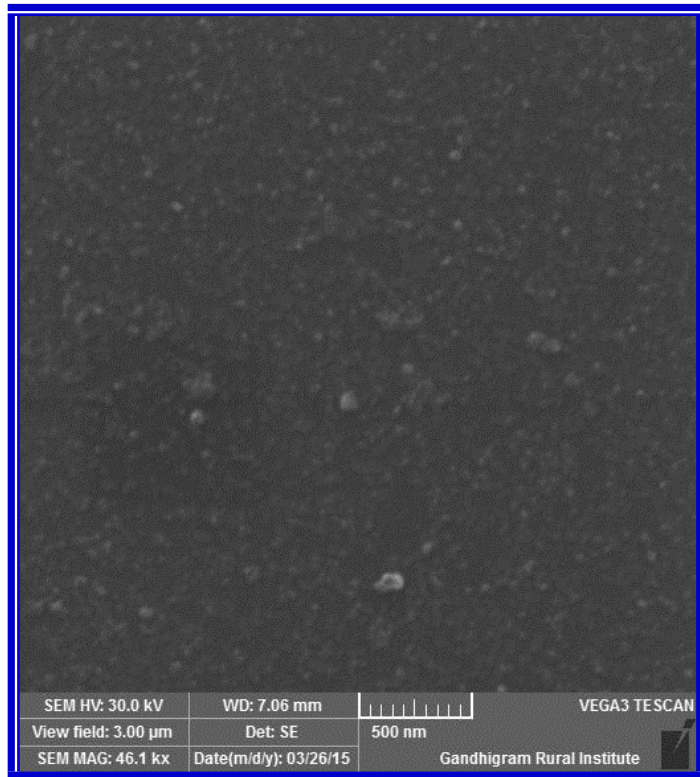

**Figure S3.** SEM image obtained for Au-AgNPs (Ag:Au=1:0.12) modified substrate.

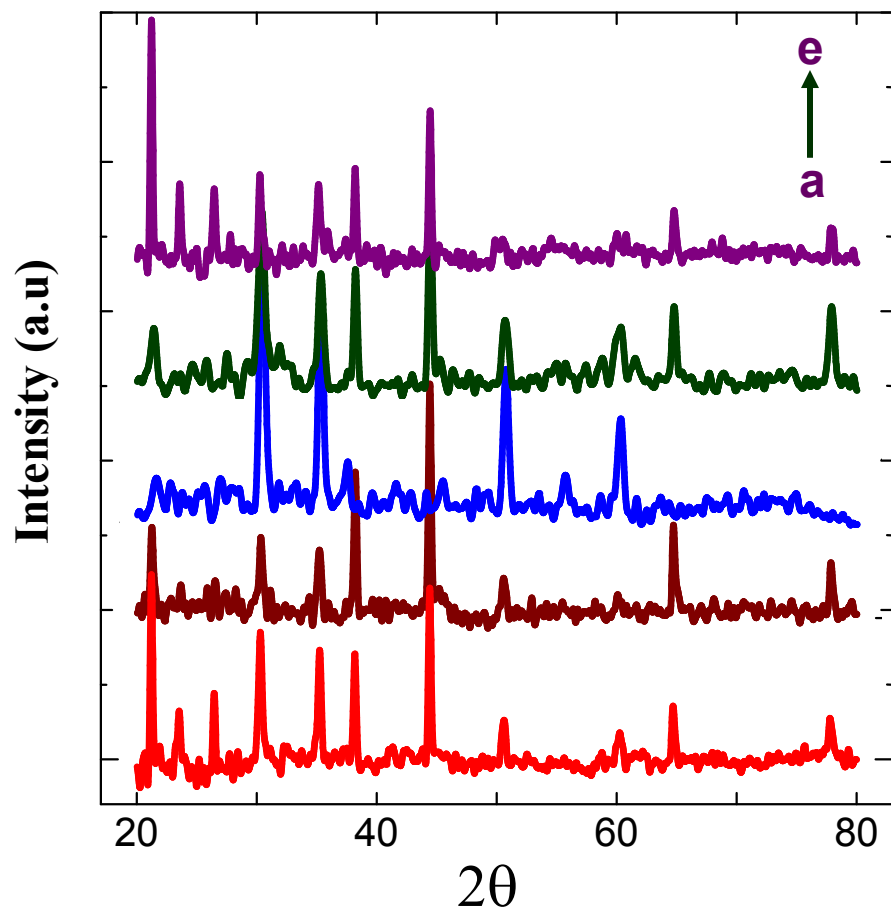

**Figure S4.** XRD patterns obtained for (a) AgNPs, (b) AuNPs and Au-AgNPs with the Ag:Au mole ratio of (c) 1:0.10, (d) 1:0.12 and (e) 1:0.14 modified ITO substrates.

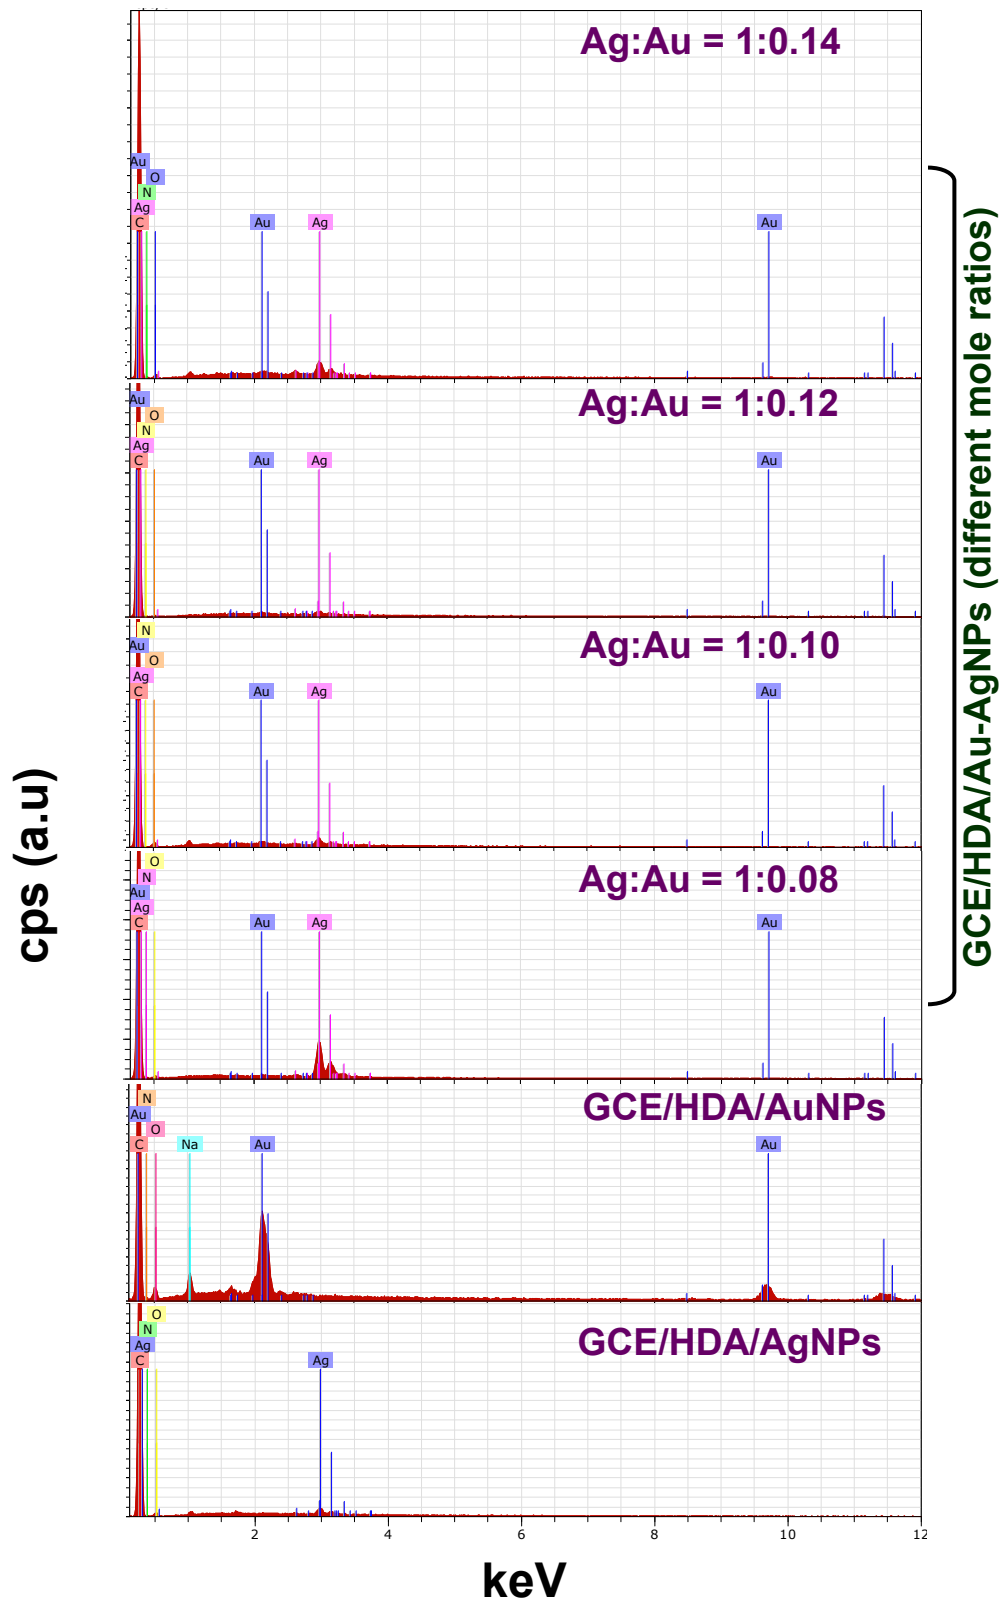

**Figure S5.** EDAX spectrum obtained for Au-AgNPs modified GC substrates.

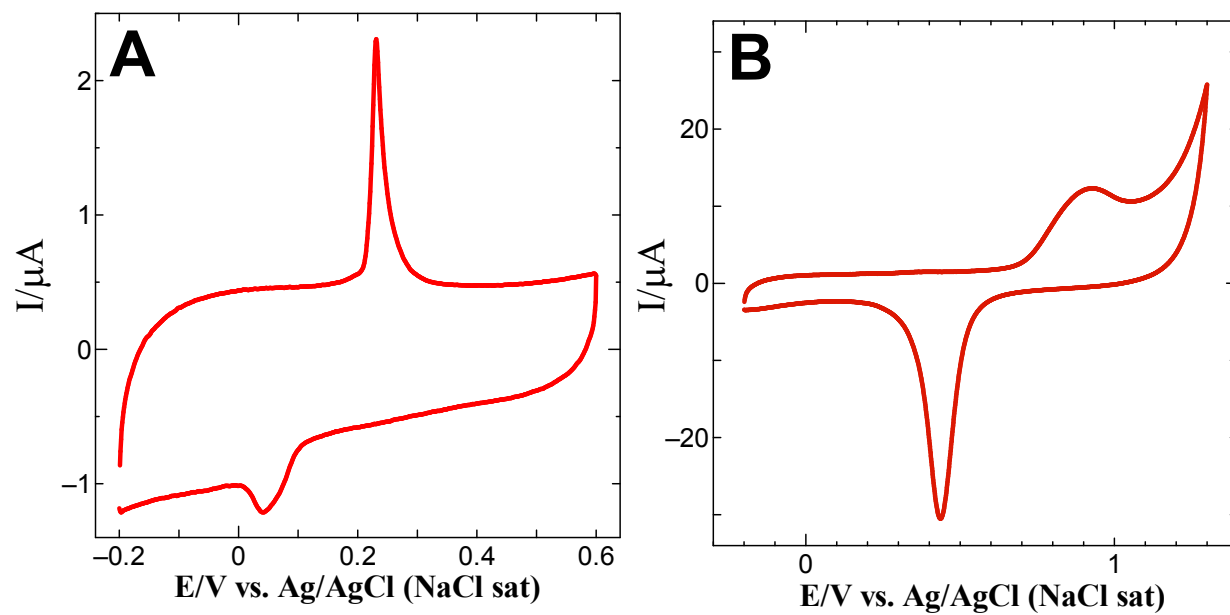

**Figure S6.** CVs obtained for (A) GC/HDA/AgNPs and (b) GC/HDA/AuNPs electrodes in 0.2 M PB solution (pH 7.2) at a scan rate of  $50 \text{ mV s}^{-1}$ .

**Table S1. EDAX-Elemental analysis**

| S.No | Electrode                            | Weight % of the element present |      |       |             |             |
|------|--------------------------------------|---------------------------------|------|-------|-------------|-------------|
|      |                                      | C                               | N    | O     | Ag          | Au          |
| 1    | GCE/HDA/AgNPs                        | 83.74                           | 3.81 | 6.13  | <b>6.33</b> | -           |
| 2    | GCE/HDA/AuNPs                        | 79.70                           | 4.09 | 16.23 | -           | <b>8.99</b> |
| 3    | GCE/HDA/Au-AgNPs<br>(Ag:Au = 1:0.08) | 84.61                           | 3.98 | 4.78  | <b>5.32</b> | <b>1.31</b> |
| 4    | GCE/HDA/Au-AgNPs<br>(Ag:Au = 1:0.10) | 84.73                           | 2.41 | 6.15  | <b>3.63</b> | <b>1.19</b> |
| 5    | GCE/HDA/Au-AgNPs<br>(Ag:Au = 1:0.12) | 85.40                           | 3.40 | 3.97  | <b>5.76</b> | <b>1.48</b> |
| 6    | GCE/HDA/Au-AgNPs<br>(Ag:Au = 1:0.14) | 84.81                           | 5.07 | 4.31  | <b>4.37</b> | <b>1.43</b> |



**Table S2. Impedance spectral data**

| Parameter                | GCE/HDA/<br>AgNPs     | GCE/HDA/<br>AuNPs     | GCE/HDA/Au-AgNPs<br>(Ag: Au mole ratio) |                       |                       |                       |
|--------------------------|-----------------------|-----------------------|-----------------------------------------|-----------------------|-----------------------|-----------------------|
|                          |                       |                       | 1:0.10                                  | 1:0.12                | 1:0.14                | 1:0.16                |
| $R_s$ (k $\Omega$ )      | 0.138                 | 0.129                 | 0.136                                   | 0.151                 | 0.131                 | 0.150                 |
| CPE ( $\mu$ F)           | $4.77 \times 10^{-6}$ | $1.49 \times 10^{-5}$ | $2.82 \times 10^{-6}$                   | $6.11 \times 10^{-6}$ | $1.47 \times 10^{-6}$ | $5.96 \times 10^{-6}$ |
| $R_{CT}$ (k $\Omega$ )   | 49.94                 | 27.70                 | 18.23                                   | 17.16                 | 19.73                 | 23.64                 |
| $k_{et}$ (cm s $^{-1}$ ) | $5.39 \times 10^{-8}$ | $4.86 \times 10^{-7}$ | $3.29 \times 10^{-7}$                   | $2.77 \times 10^{-7}$ | $3.40 \times 10^{-7}$ | $3.75 \times 10^{-7}$ |

**Table S3. Comparison of onset reduction potential and limit of detection of HP obtained from the present modified electrode with the reported modified electrodes.**

| S.No | Electrodes                     | Onset potential (vs. AgCl) | pH  | Linear range         | Detection limit ( $\mu\text{M}$ ) | Reference |
|------|--------------------------------|----------------------------|-----|----------------------|-----------------------------------|-----------|
| 1    | Au@Ag nanorods/GCE             | -0.30 V                    | 6.5 | 0.02-7.02 mM         | 0.67                              | [20]      |
| 2    | Au@Ag nanoparticles/GCE        | -0.10 V*                   | 7.2 | 0.005-15 mM          | 1.3                               | [34]      |
| 3    | Au-Ag/BMT <sup>a</sup> -NF/GCE | -0.40 V                    | 7.0 | 1-250 $\mu\text{M}$  | -                                 | [35]      |
| 4    | Ag@Cu nanowires/GCE            | -0.40 V                    | 7.2 | 1-10 mM              | 3                                 | [36]      |
| 5    | Au@AgNPs/GCE                   | -0.40 V                    | 7.2 | 10-110 $\mu\text{M}$ | 0.12                              | This work |

<sup>a</sup>BMT-NF: 1-Butyl-3-methylimidazolium tetrafluoroborate/Nafion, \*(vs. SCE)

**Table S4. Comparison of onset reduction potential and limit of detection of NB obtained from the present modified electrode with the reported modified electrodes.**

| S.No. | Electrodes         | Onset potential (vs. AgCl) | pH  | Linear range          | Detection limit ( $\mu\text{M}$ ) | Reference |
|-------|--------------------|----------------------------|-----|-----------------------|-----------------------------------|-----------|
| 1     | Au/Ag-TPDT NRs/GCE | -0.50 V                    | 7.0 | -                     | -                                 | [37]      |
| 2     | TPDT-Ag NPs/GCE    | -0.55 V                    | 7.2 | 1-7 $\mu\text{M}$     | 1.0                               | [38]      |
| 3     | AuNPs/GCE          | -0.60 V                    | 7.0 | 0.1-600 $\mu\text{M}$ | 0.016                             | [39]      |
| 4     | PAA-AgNPs/GCE      | -0.50 V                    | 7.0 | 10-600 $\mu\text{M}$  | 1.68                              | [40]      |
| 5     | RGO-AgNPs/GCE      | -0.30 V                    | 7.0 | 0.5-900 $\mu\text{M}$ | 0.26                              | [41]      |
| 6     | Au@AgNPs/GCE       | -0.30 V                    | 7.2 | 10-120 $\mu\text{M}$  | 0.23                              | This work |

*TPDT*:  $\text{N}^1$ -[3-(trimethoxysilyl)propyl]diethylene triamine, *NRs*: Nanorods, *PAA-AgNPs*: AgNPs embedded in poly(amic) acid, *RGO*: reduced graphene oxide
